# Supplementary material
Source: ML conference proceedings conference paper supplement (https://aclanthology.org/2026.semeval-1.235)

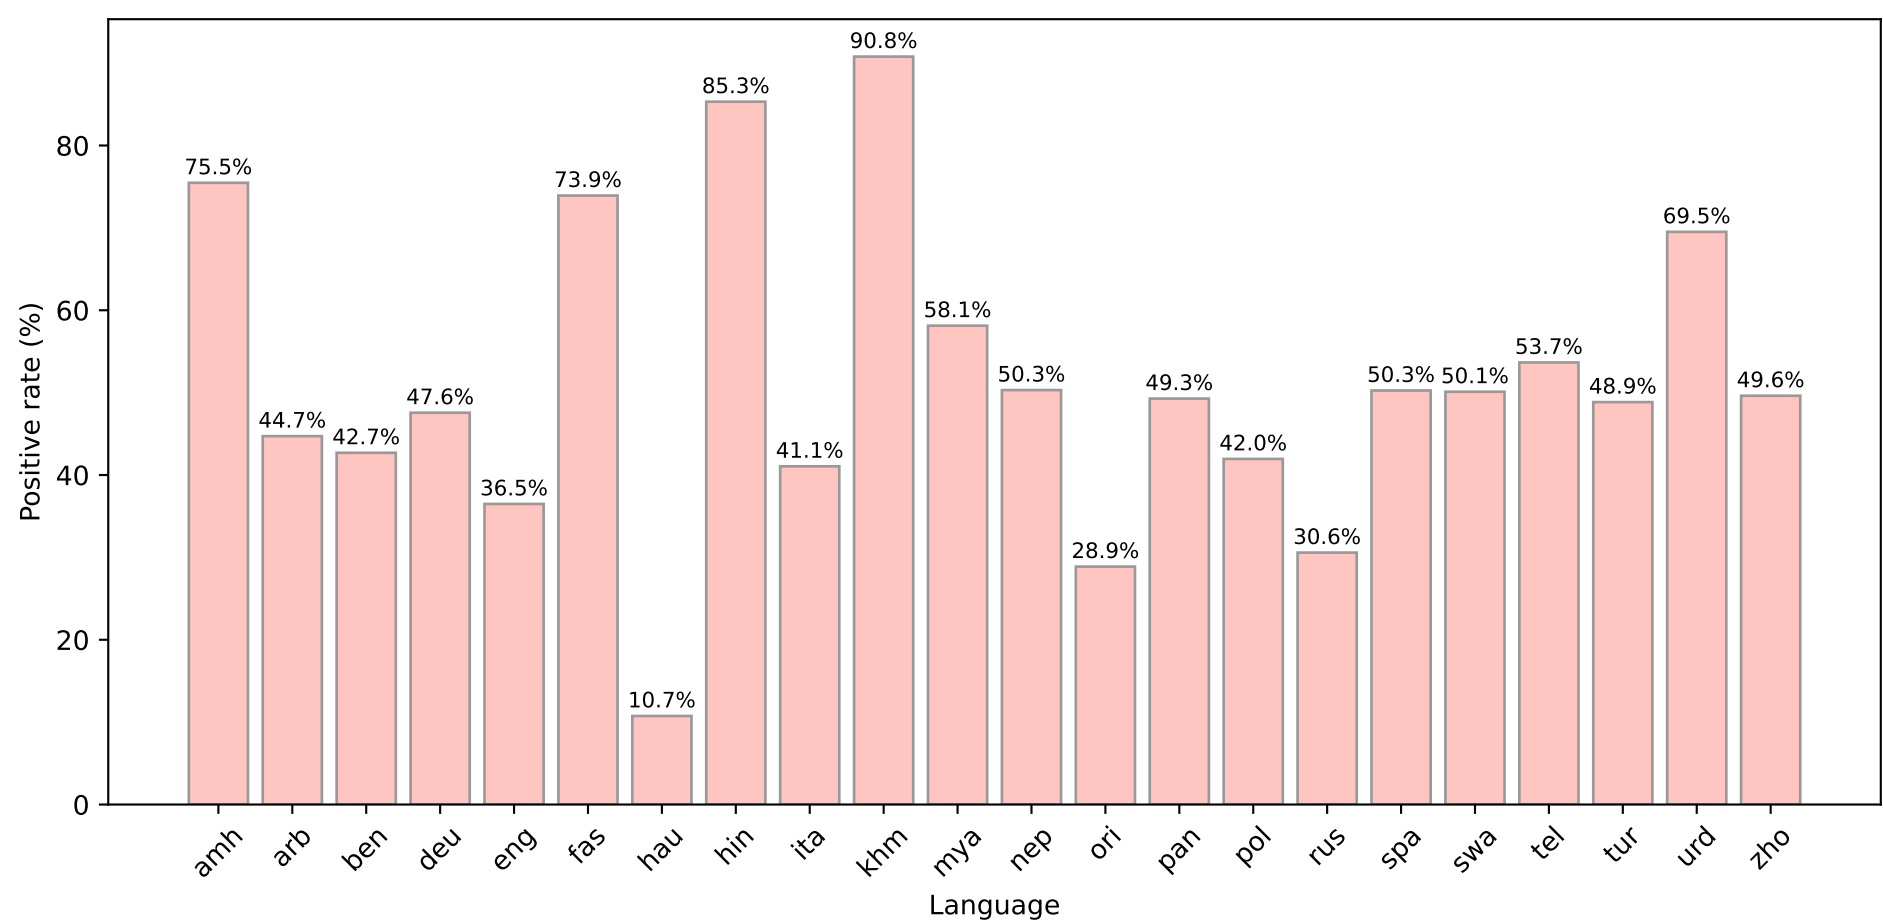

Supplement: SupplementaryMaterial [file appendix_bar_s1_by_language.pdf › paper_source/figures/appendix_bar_s1_by_language.pdf]

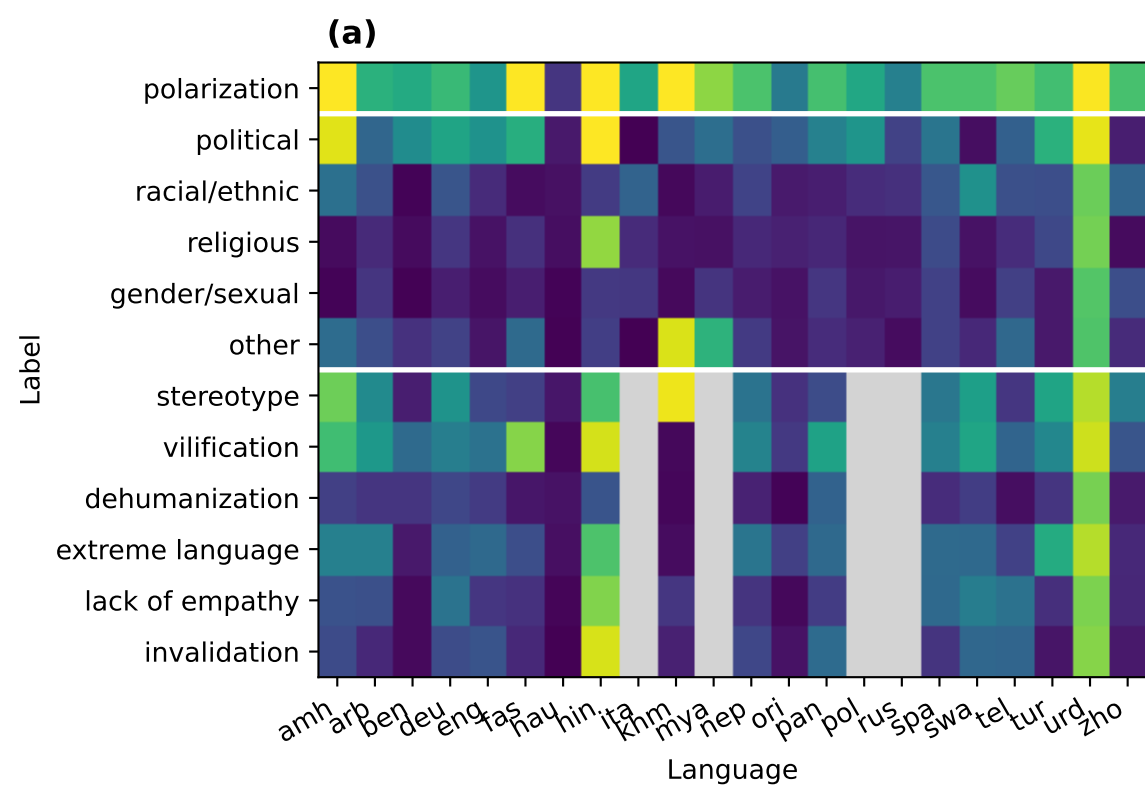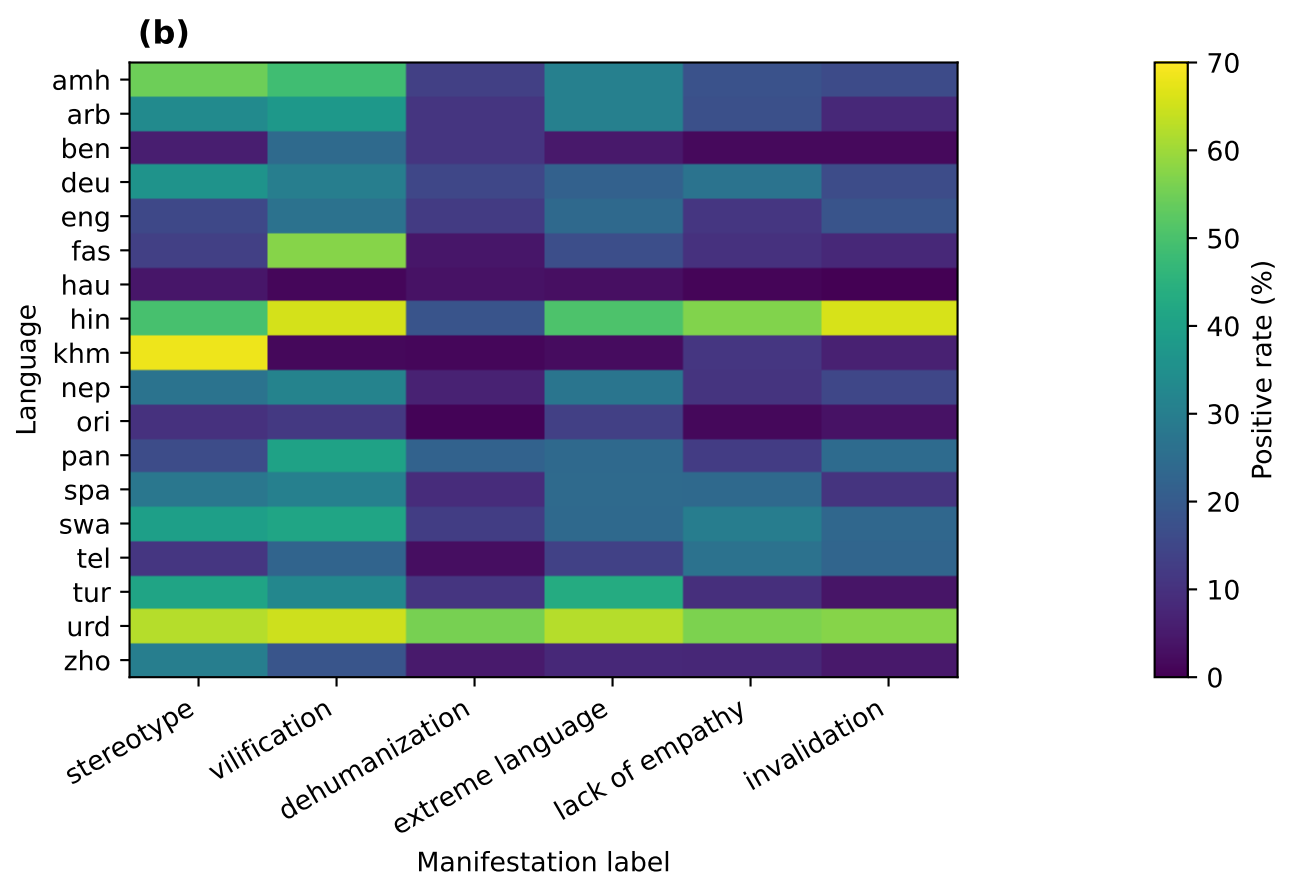

Supplement: SupplementaryMaterial [file imbalance.pdf › paper_source/figures/imbalance.pdf]

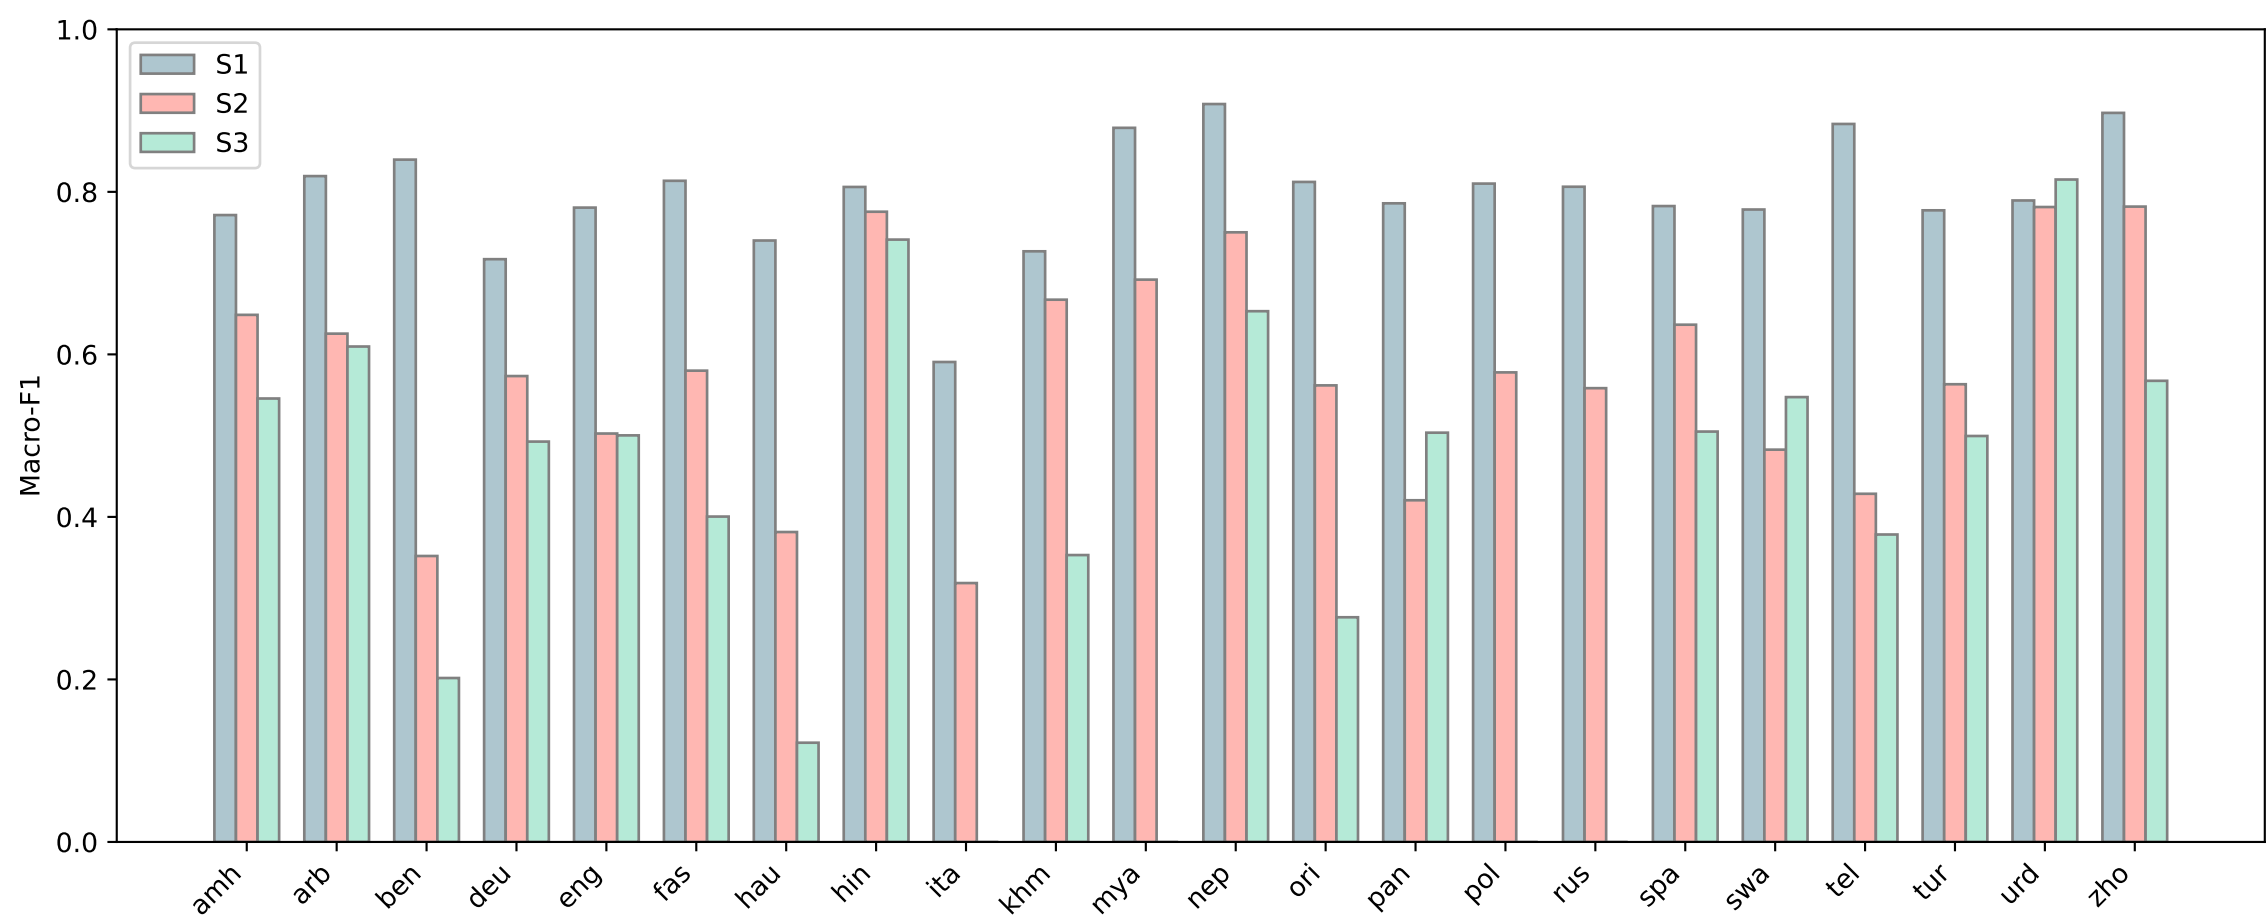

Supplement: SupplementaryMaterial [file test_per_language_grouped_bar.pdf › paper_source/figures/test_per_language_grouped_bar.pdf]

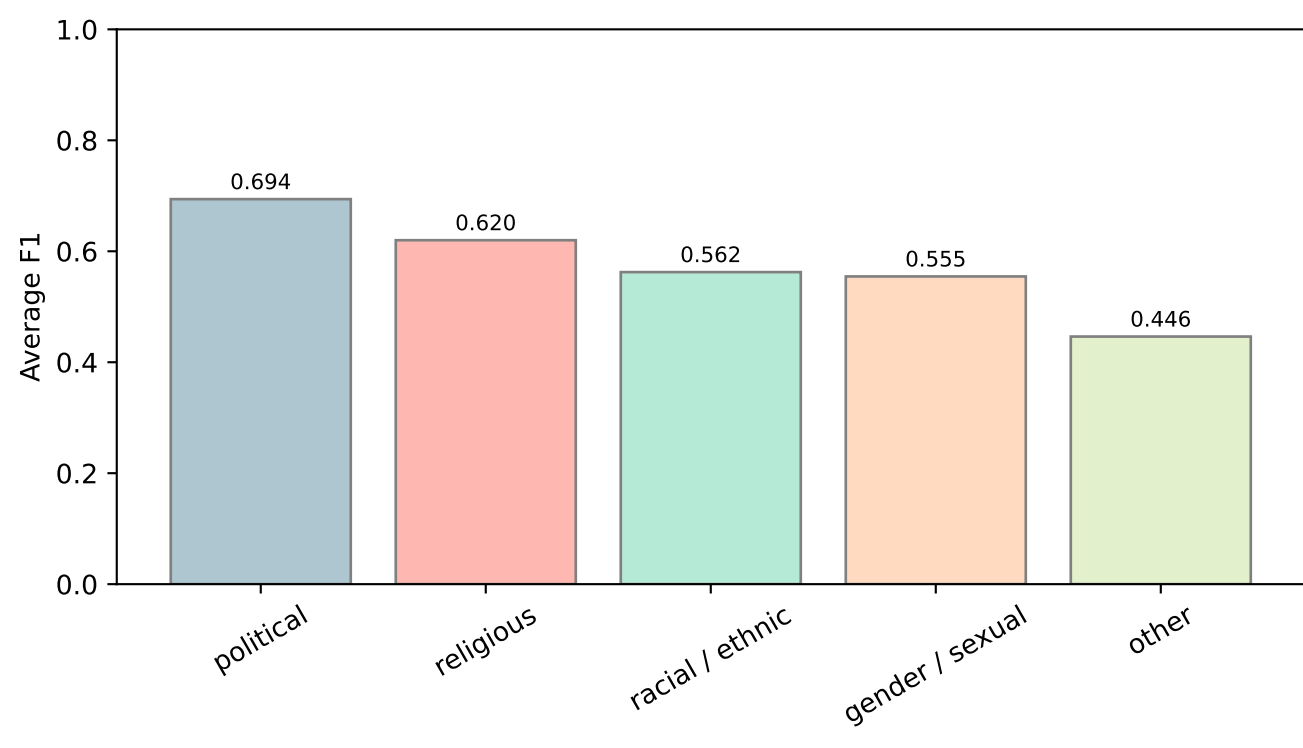

Supplement: SupplementaryMaterial [file test_s2_avg_label_f1_bar.pdf › paper_source/figures/test_s2_avg_label_f1_bar.pdf]

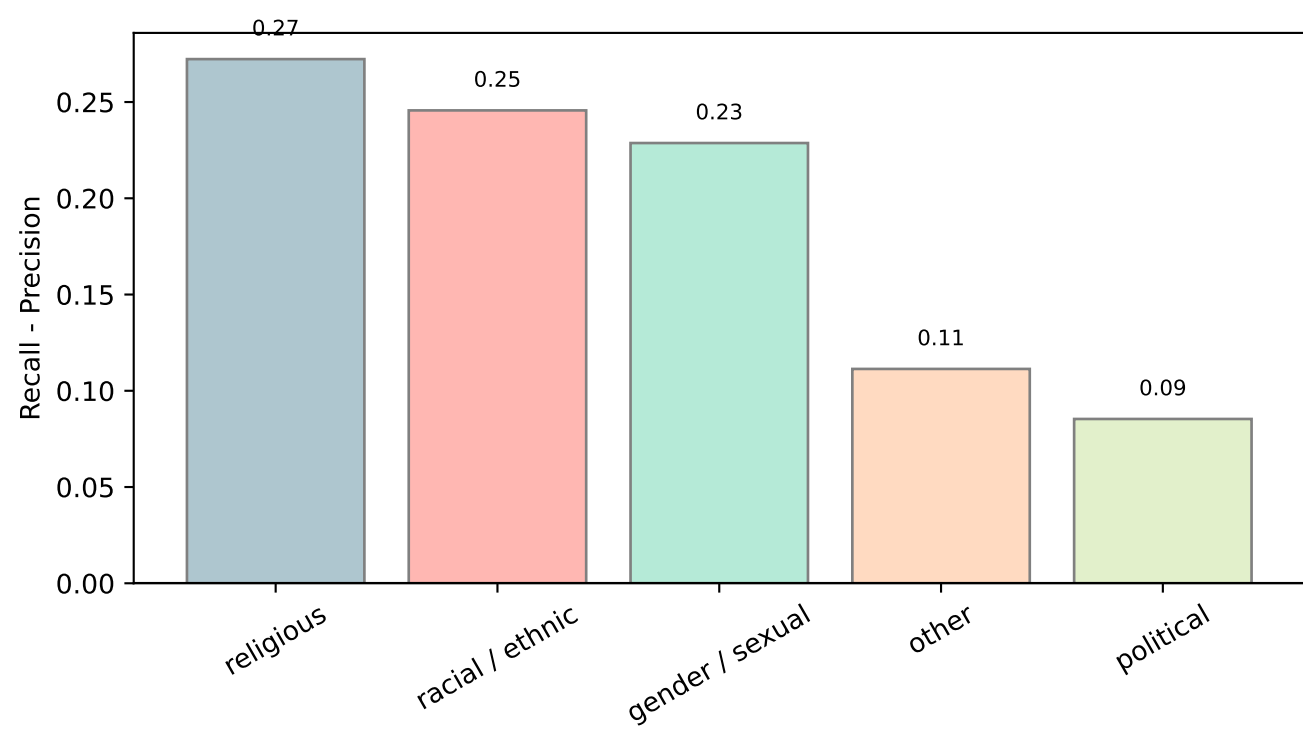

Supplement: SupplementaryMaterial [file test_s2_precision_recall_gap.pdf › paper_source/figures/test_s2_precision_recall_gap.pdf]

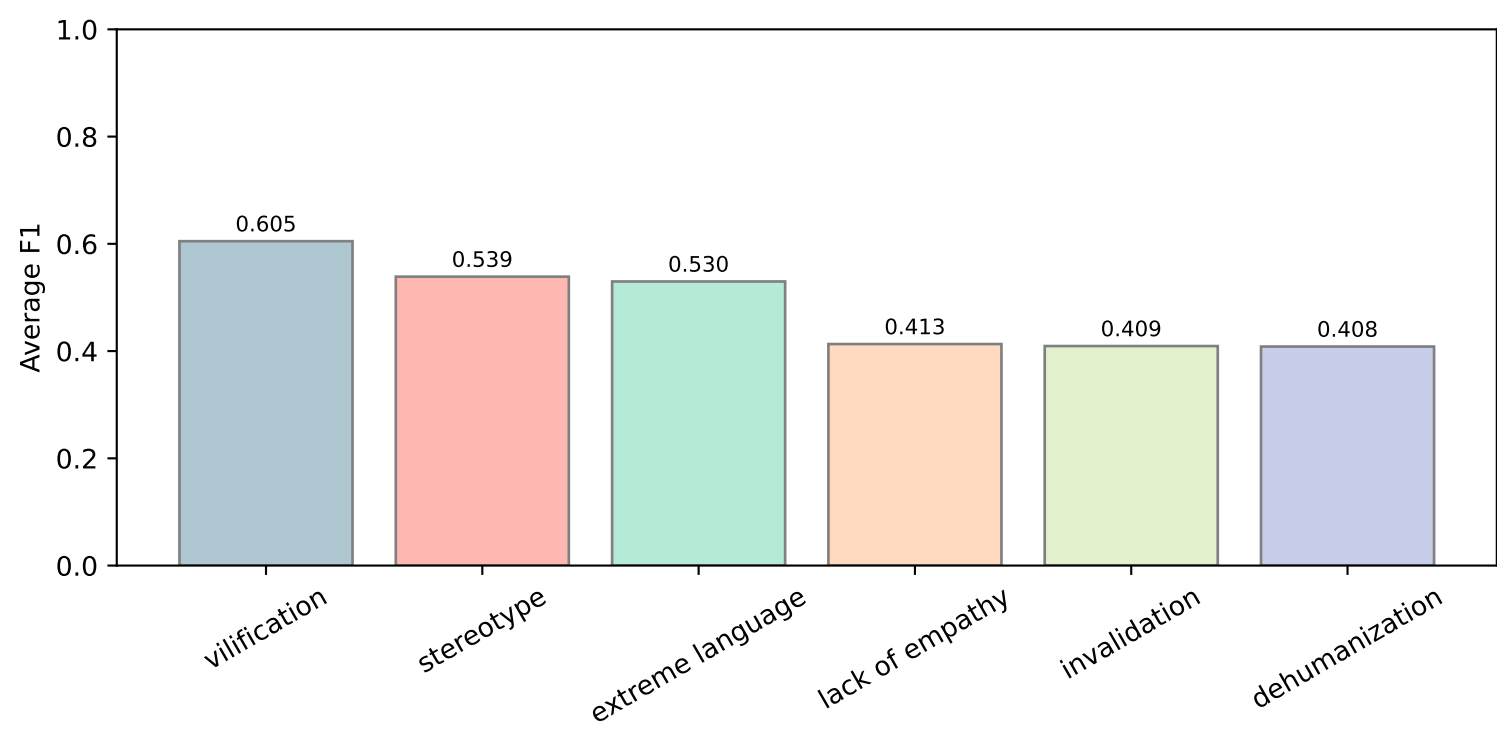

Supplement: SupplementaryMaterial [file test_s3_avg_label_f1_bar.pdf › paper_source/figures/test_s3_avg_label_f1_bar.pdf]

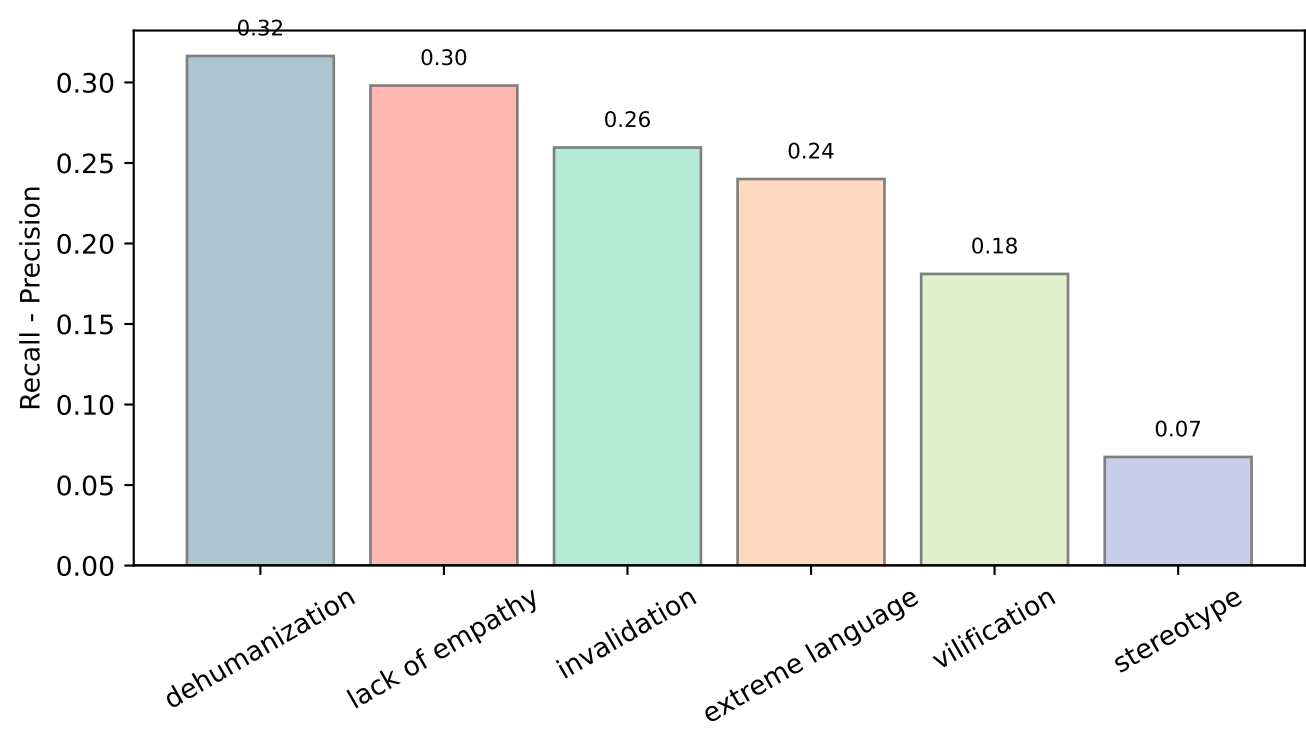

Supplement: SupplementaryMaterial [file test_s3_precision_recall_gap.pdf › paper_source/figures/test_s3_precision_recall_gap.pdf]
